# Supplementary material for: Isolation and characterization of Helicobacter suis from human stomach
Source: PubMed Central journal article supplement — Proc Natl Acad Sci U S A. 2021 Mar 22;118(13):e2026337118. doi: 10.1073/pnas.2026337118 (PMC8020762; doi:10.1073/pnas.2026337118), 2021-03-22
Supplement: pnas.2026337118.sapp.pdf [file pnas.2026337118.sapp.pdf]

# PNAS

www.pnas.org

Supplementary Information for

## Isolation and characterization of *Helicobacter suis* from human stomach

Emiko Rimbara<sup>1\$#</sup>, Masato Suzuki<sup>2\$</sup>, Hidenori Matsui<sup>3#</sup>, Masahiko Nakamura<sup>4</sup>, Misako Morimoto<sup>5</sup>, Chihiro Sasakawa<sup>5, 6</sup>, Hiroki Masuda<sup>7, 8</sup>, Sachiyo Nomura<sup>7</sup>, Takako Osaki<sup>8</sup>, Noriyo Nagata<sup>9</sup>, Keigo Shibayama<sup>1</sup>, Kengo Tokunaga<sup>10#</sup>

- 1 Department of Bacteriology II, National Institute of Infectious Diseases, Tokyo, Japan
- 2 Antimicrobial Research Center, National Institute of Infectious Diseases, Tokyo, Japan
- 3 Omura Satoshi Memorial Institute, Kitasato University, Tokyo, Japan
- 4 School of Pharmacy, Kitasato University, Tokyo, Japan
- 5 Nippon Institute for Biological Science, Tokyo, Japan
- 6 Medical Mycology Research Center, Chiba University, Chiba Tokyo, Japan
- 7 Department of Gastrointestinal Surgery, Graduate School of Medicine, The University of Tokyo, Tokyo, Japan
- 8 Department of Gastrointestinal Surgery, Nippon Medical University, Tokyo, Japan
- 9 Department of Infectious Diseases, Kyorin University School of Medicine, Tokyo, Japan
- 10 Department of Pathology, National Institute of Infectious Diseases, Tokyo, Japan
- 11 Department of General Medicine, Kyorin University School of Medicine, Tokyo, Japan

\$ contributed equally

# corresponding authors

Emiko Rimbara, Ph. D.

Department of Bacteriology II, National Institute of Infectious Diseases

4-7-1 Gakuen, Musashimurayama-shi, Tokyo 208-0011, JAPAN

Tel: +81-42-561-0771

Email: rimbara@niid.go.jp

Hidenori Matsui, Ph. D.

Kitasato Institute for Life Sciences, Kitasato University

5-9-1 Shirokane, Minato-ku, Tokyo 108-8641, JAPAN

Tel: +81-3-5791-6267

Email: hmatsui@lisci.kitasato-u.ac.jp

Kengo Tokunaga M.D., Ph. D.

Department of General Medicine, Kyorin University School of Medicine

6 - 20 - 2, Shinkawa, Mitaka, Tokyo 181-8611, JAPAN

Tel: +81 - 422 - 47 - 5511

Email: kentoku@ks.kyorin-u.ac.jp

**This PDF file includes:**

Supplementary text  
Figures S1 to S8  
Tables S1 to S4  
References

## Supplementary Information Text

### Supplemental Materials and Methods

#### MIC measurements

Susceptibility testing of *H. suis* isolates was performed by a broth microdilution method using NHPH medium containing triphenyl tetrazolium chloride (50 mg/L for NHP19-4003, NHP19-4004, and SNTW101c; and 10 mg/L for NHP19-4022 and NHP19-0020). Bacterial suspensions ( $10^5$  cells/mL) were incubated with serially diluted antimicrobial agents (amoxicillin, oxacillin, clarithromycin, minocycline, gentamicin, and levofloxacin: Eiken, Tokyo, Japan; metronidazole: Sigma), and absorbance at 560 nm was measured after incubation for 8–12 days, depending on the growth of each isolate. The MIC values were defined as the lowest concentrations that inhibited the bacterial growth.

#### Determination of relative *H. suis* bacterial number in mice stomach

Relative *H. suis* bacterial number in the mouse stomach was evaluated by probe-based quantitative PCR targeting the gene encoding the *H. pylori* VacA-like autotransporter protein (NHP194003\_11930 gene in NHP19-4003) in *H. suis*; the comparative  $\Delta$ Ct method was used to calculate relative gene abundance. Because other *Helicobacter* species have similar autotransporter proteins, a set of primers and probe was designed against the region specific for *H. suis* by comparing the NHP194003\_11930 gene with other genes encoding autotransporter proteins, including *omp897* of *H. felis* ATCC49179; *omp1914* of *H. bizzozeronii* M7; and *faa* (HP0610), *imaA* (HP0289), and *vlpC* (HP0922) of *H. pylori* 26695. Finally, the following primer sets were purchased from PrimeTime qPCR probes (IDT, Integrated DNA Technologies) for amplification of the NHP194003\_11930 gene: NHP194003\_11930\_forward (5'-CTGGTAATGCATCATTAGAAGCAA-3'), NHP194003\_11930\_reverse (5'-GATGGGCGCTTCTGGTTTA-3'), and NHP194003\_11930\_probe (/56-FAM/TGTACACAC/ZEN/CAAACAGATGAGCCGT/3IABkFQ/).  $\beta$ -actin was used as an internal control using following primers:  $\beta$ -actin\_forward (5'-GACTCATCGTACTCCTGCTTG-3'),  $\beta$ -actin\_reverse (5'-GATTACTGCTCTGGCTCCTAG-3'), and  $\beta$ -actin\_probe (/56-FAM/CTGGCCTCA/ZEN/CTGTCCACCTTCC/3IABkFQ/). DNA was extracted from mouse stomach using the DNeasy Blood & Tissue Kit (Qiagen), and 100 ng/ $\mu$ L DNA was used for each reaction. PCRs were performed in an Applied Biosystems 7500 Fast Real-Time PCR System (Thermo Fisher Scientific). Probe-PCR was performed in triplicate for each sample, and the  $2^{-\Delta\text{CT}}$  (NHP194003\_11930-b-actin) value of each sample was used for comparison. The relative value was calculated by dividing the  $2^{-\Delta\text{Ct}}$  (NHP194003\_11930-b-actin) of each sample by the average of the  $2^{-\Delta\text{CT}}$  (NHP194003\_11930-b-actin) values of the SNTW101c-infected group.

#### Measurements of cytokines and chemokines in mice serum

IFN- $\gamma$ , IL-1 $\beta$ , IL-2, IL-4, IL-8, IL-10, IL-12 (p70), IL-17, MCP-1, RANTES, and TNF- $\alpha$  in serum were measured using the Milliplex MAP Mouse Cytokine/Chemokine magnetic bead panel (Millipore) on a Luminex 200 system (Luminex, Austin, TX, USA).

#### ELISA for measuring *H. suis*-specific IgG in mice serum

Nunc-Immuno 96-well microtiter plates (No. 439454; Thermo Fisher Scientific) containing 100  $\mu$ L (4  $\mu$ g/mL in 0.1 M carbonate/bicarbonate buffer, pH 9.4) of whole-cell lysates of *H. suis* SNTW101c, or BSA, were incubated overnight at 4°C in a humid covered box. After three washes with phosphate-buffered saline containing 0.05% (v/v) Tween 20, pH 7.4 (PBS-T), the wells were saturated with 200  $\mu$ L of PBS containing 1% BSA for an hour at 37°C. After three washes with PBS-T, the wells were filled with 50  $\mu$ L of serum samples (dilution range of 1:500 or 1:1,000 with PBS containing 1% BSA), and the plates were incubated for an hour at 37°C. After three washes with PBS-T, the wells were filled with 50  $\mu$ L of a donkey anti-mouse IgG (Jackson) solution diluted 1:100,000 with PBS containing 1% BSA, and the plates were incubated for an hour at 37°C. After three washes with PBS-T, the wells were filled with 50  $\mu$ L of KPL SureBlue TMB Microwell Peroxidase Substrate (1-Component) (Sera Care Life Sciences, Milford, MA, USA). The color reaction was stopped by addition of 50  $\mu$ L of 1 N hydrochloric acid into the wells. The

absorbance at wavelength 450 nm (reference wavelength, 630 nm) was measured on a microplate reader.

**Determination of SNPs found in *H. suis* draft genomes recovered from experimental mice infection.**

Whole-genome sequencing of *H. suis* isolates recovered from mouse stomachs 4 months after infection was performed on a MiniSeq platform (Illumina) with the High Output Reagent Kit (300 cycles). The library (paired-end, insert size of 500–900 bp) was prepared using the Nextera XT DNA Library Prep Kit (Illumina). Reads were mapped to the reference genome, and then SNV and short indels were detected using CLC Genomic Workbench v11.0.1 (Qiagen).

**Statistics**

Prism 8 (GraphPad Software, La Jolla, CA, USA) was used for statistical analysis. Data represent means  $\pm$  standard deviation (SD).  $p < 0.05$  was considered statistically significant.

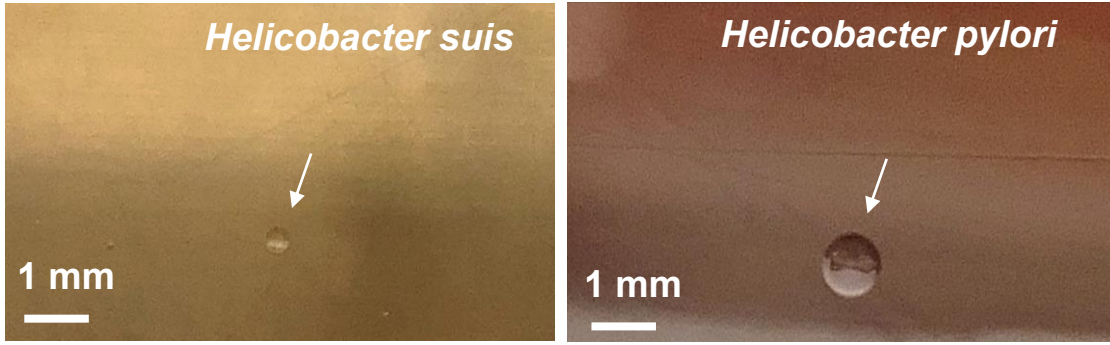

**Fig. S1.** Colonies of *Helicobacter suis* strain NHP19-4022 from a human patient and *Helicobacter pylori* strain TS1903 on an agar plate

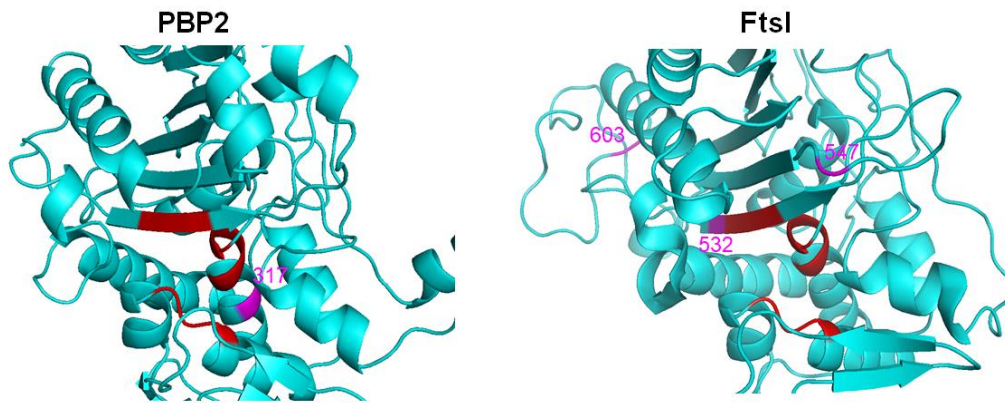

**Fig. S2. Predicted structures of PBP2 and FtsI of *H. suis* SNTW101c**

Structures were predicted using Robetta (<http://rosetta.bakerlab.org/>).

Red region; penicillin-binding motif (SVVK-SVD-KTG), pink positions; specific substitutions (S317M in PBP2 and G532A, E547K, and T603I in FtsI) found in *H. suis* NHP19-4004 strain.

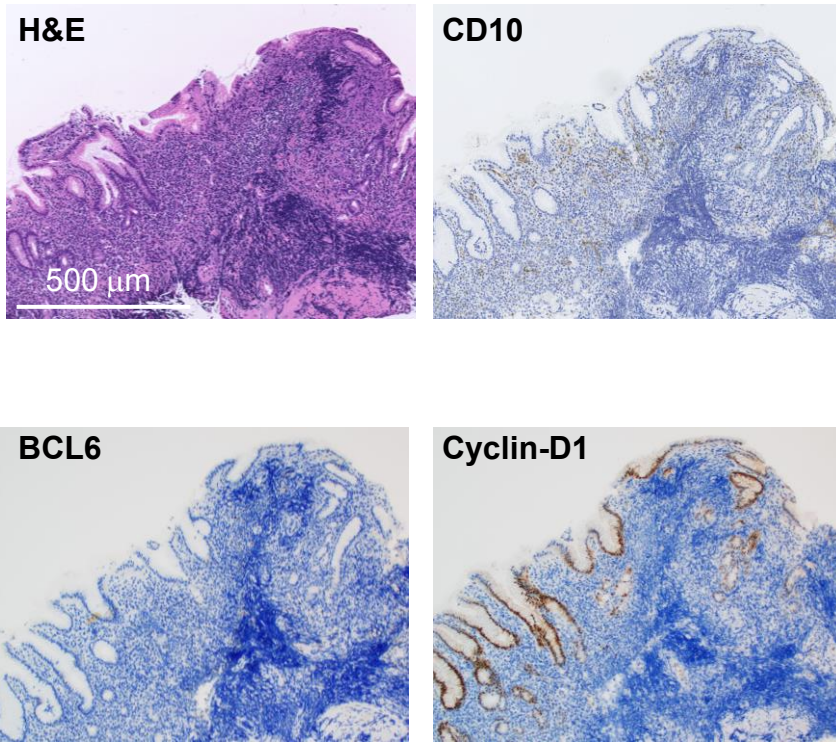

**Fig. S3. Histological examination of gastric biopsies obtained from patient A.**

Lymphocytes were all negative for CD10, BCL6, and Cyclin D1.

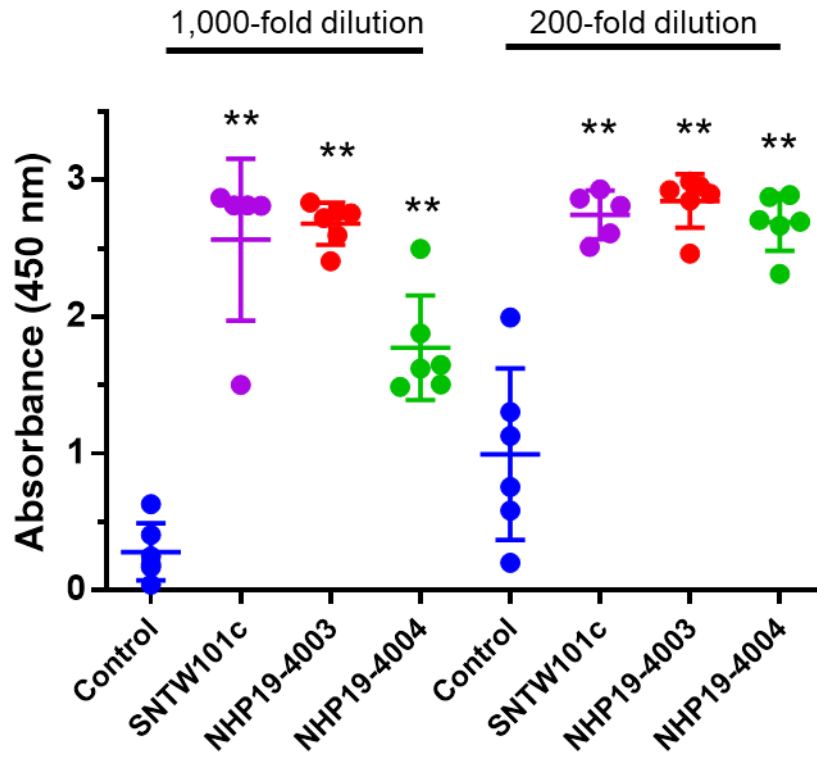

**Fig. S4. *H. suis*-specific IgG levels in serum of *H. suis*-infected mice and control mice.** The bars indicate mean±S.D. Each of the *H. suis*-infected samples was compared with the control sample using one-way ANOVA with Dunnett's test. \*\*p<0.01.



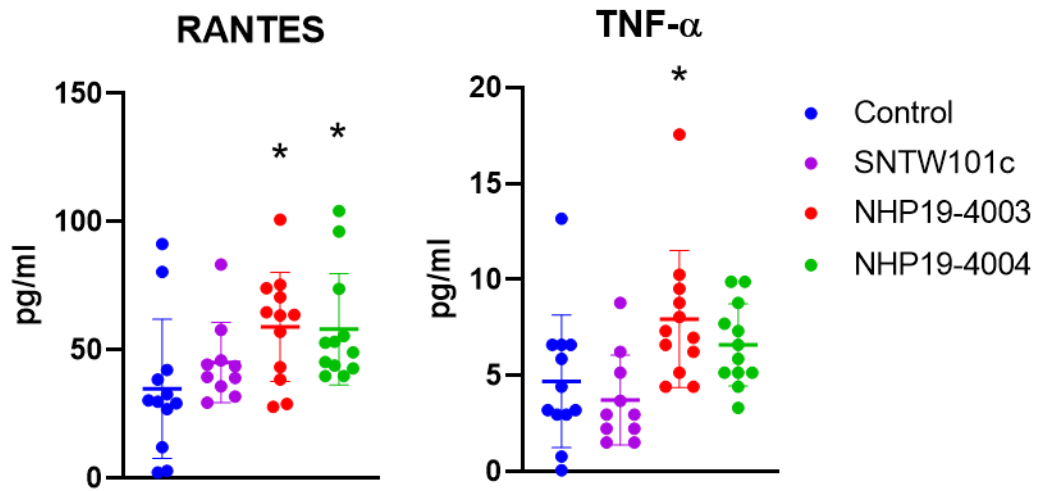

**Fig. S5. Serum RANTES and TNF- $\alpha$  concentrations in *H. suis*-infected mice and control mice.**

The bars indicate mean $\pm$ S.D. Each of the *H. suis*-infected samples was compared with control samples using one way ANOVA and Dunnett's test. \*p<0.05.

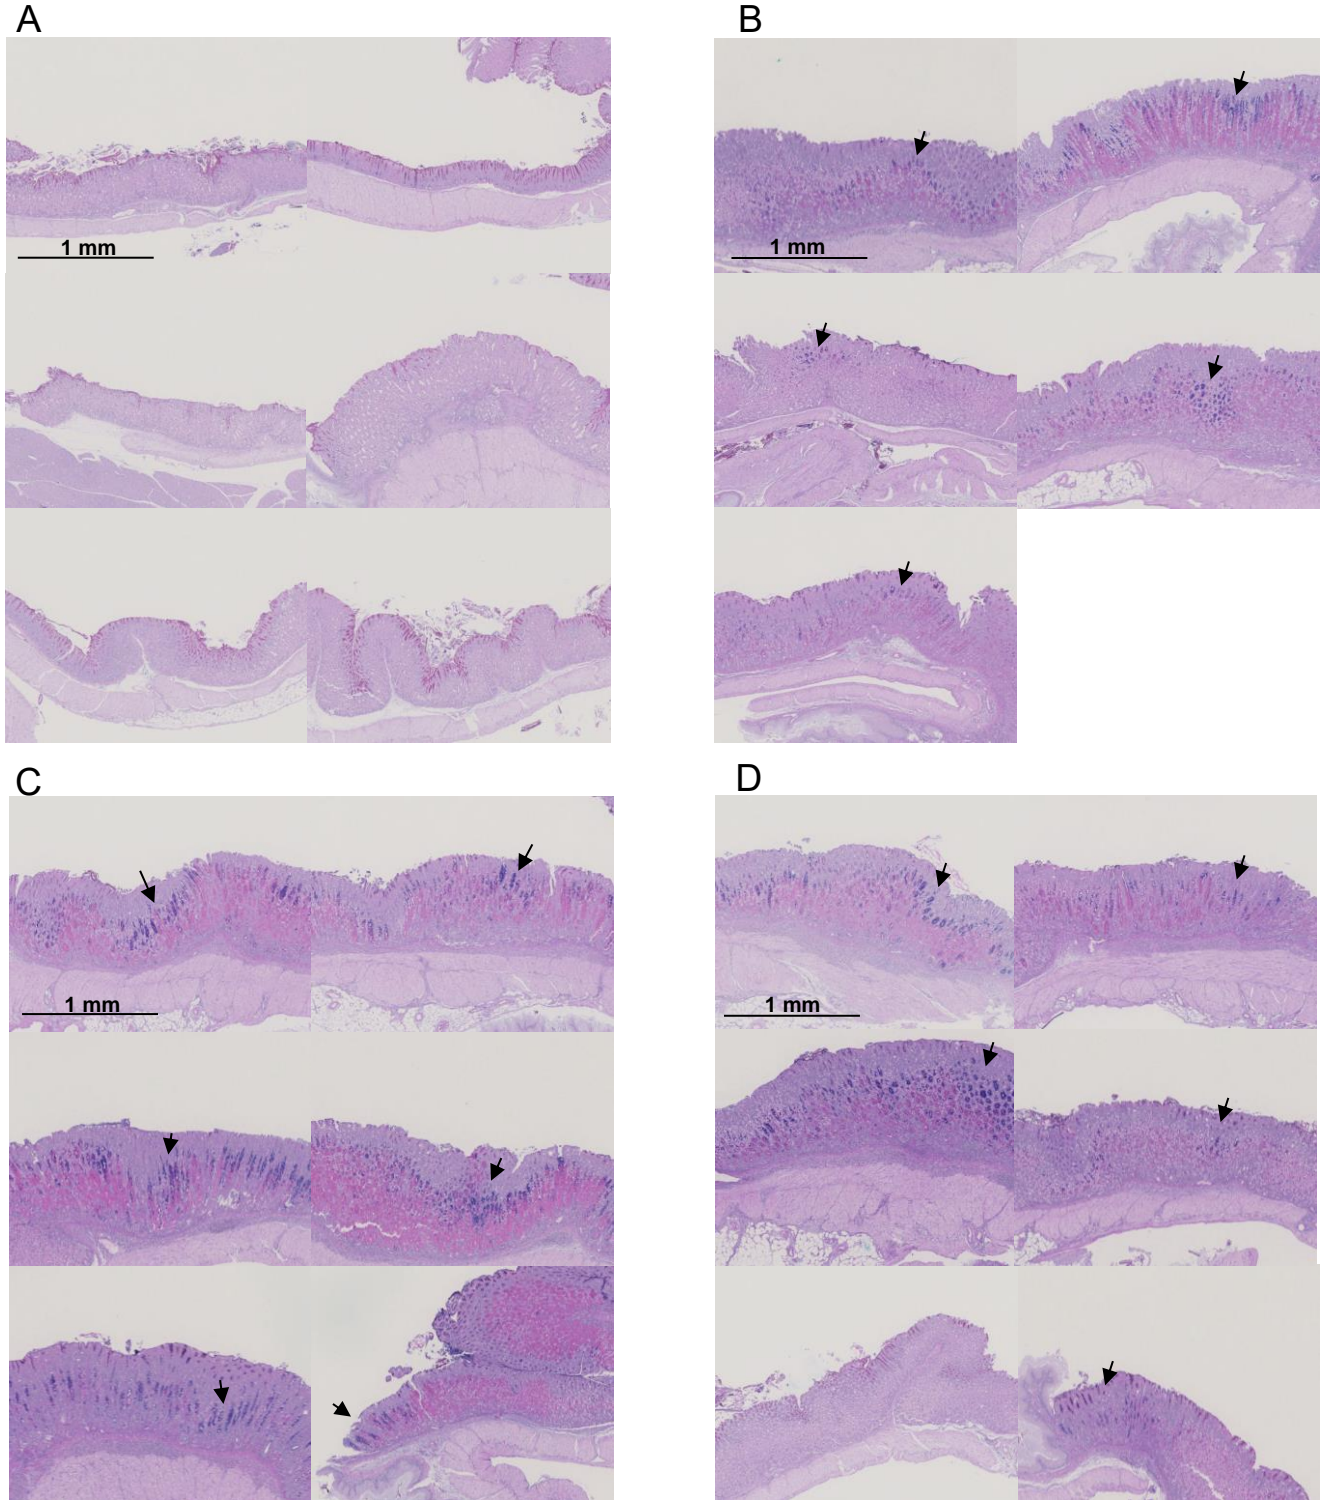

**Figure S6. Alcian blue–PAS staining of gastric mucosa of *H. suis*–infected mice and control mice.**

A, Control mice (n=6); B, SNTW101c-infected mice (n=5); C, NHP19-4003–infected mice (n=6); D, NHP19-4004–infected mice (n=6) . Acidic mucus, stained blue by Alcian blue–PAS staining (arrows), was observed in *H. suis*–infected mice.

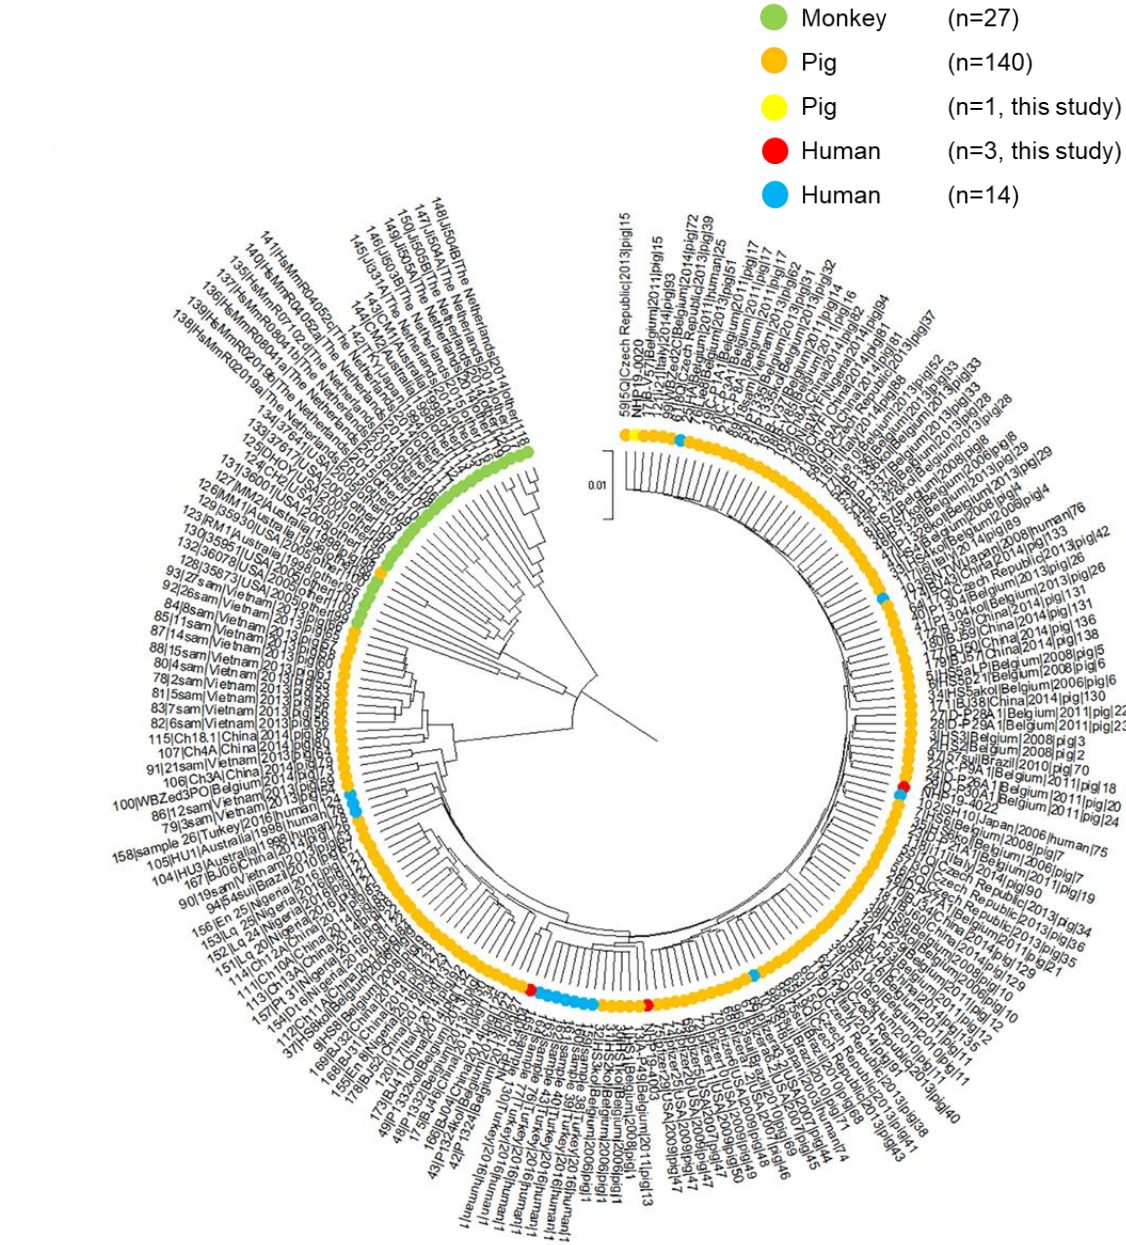

**Figure S7. Phylogenetic analysis based on MLST data of *H. suis* isolates.**

Phylogenetic tree using the data sets of the indicated 181 isolates from PubMLST and four isolates in from this study. The evolutionary distances were computed using the Maximum Composite Likelihood method and are in the units of the number of base substitutions per site. There was a total of The final dataset contained 4,084 positions in the final dataset. Green, orange, yellow, red, and blue circles indicate isolates from monkeys (PubMLST), pigs (PubMLST), pigs (this study), humans (this study), and humans (PubMLST), respectively.

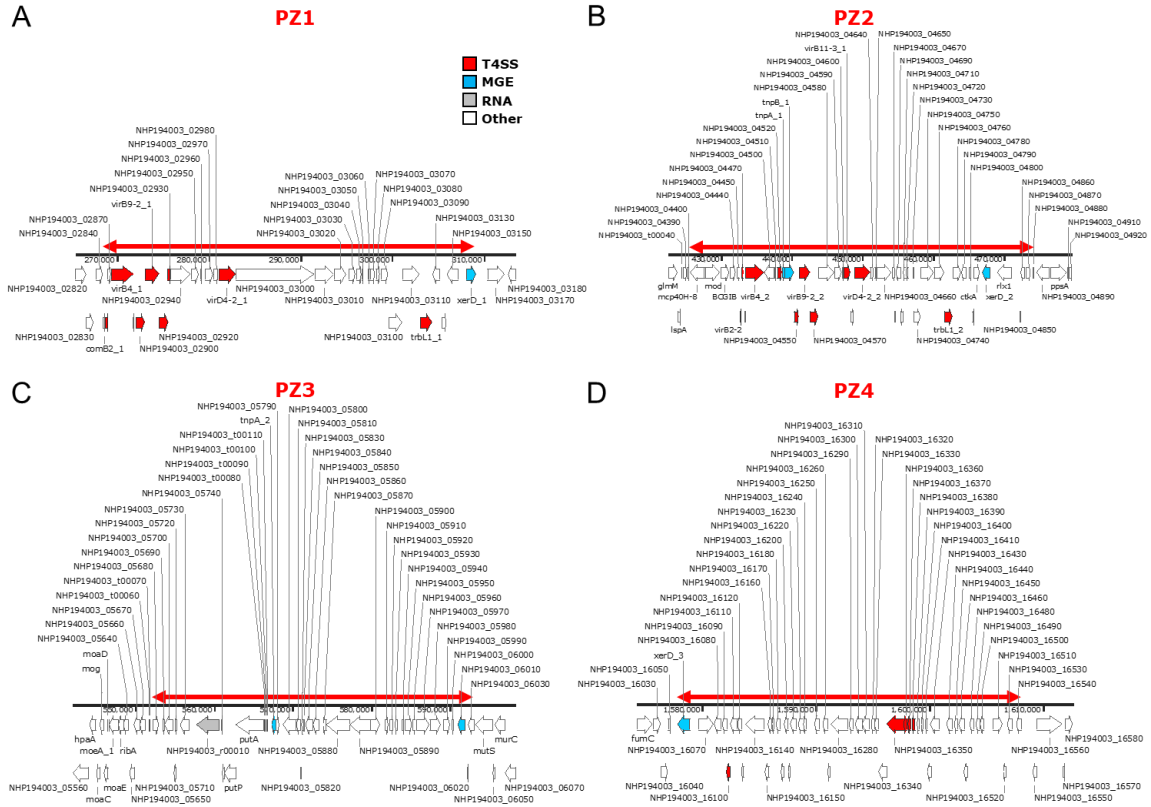

**Figure S8. Plasticity zone regions in *H. suis* chromosomes.**

Schematic representation of genes in plasticity zone (PZ) regions in NHP19-4003. (A) PZ1 containing genes between NHP194003\_02860 and NHP194003\_03160. (B) PZ2 containing genes between NHP194003\_04410 and NHP194003\_04880. (C) PZ3 containing genes between NHP194003\_05680 and NHP194003\_06030. (D) PZ4 containing genes between NHP194003\_16060 and NHP194003\_16540. Genes colored in red, blue, gray, and white indicate type IV secretion-associated genes (T4SS), mobile gene elements (MGE), RNA, and other genes, respectively.



**Table S1. Summary of the effect of eradication of non-*Helicobacter pylori* Helicobacters in gastric disease**

| Authors                        | Year | Country | Number of cases | Median age (range) | Sex (M : F) | Diagnosis       | NHPH identification (species)              | Eradication regimen              | Outcome   |
|--------------------------------|------|---------|-----------------|--------------------|-------------|-----------------|--------------------------------------------|----------------------------------|-----------|
| Goddard AF <i>et al.</i> (1)   | 1997 | UK      | 1               | 47                 | 1:0         | DU              | Histology                                  | O80+DeNol480+TC2000+M1200 / 14Td | Effective |
| YamamotoT <i>et al.</i> (2)    | 1999 | Japan   | 1               | 71                 | 1:0         | EG              | Histology                                  | O20+A1500+ES / 14Td              | Effective |
| Morgner A <i>et al.</i> (3)    | 2000 | Germany | 5               | 65 (42-79)         | 3:2         | MALT            | Histology and PCR <sup>#1</sup>            | O120+A2250 / 14Td                | Effective |
| Yoshimura M <i>et al.</i> (4)  | 2002 | Japan   | 1               | 69                 | 0:1         | AGML            | Histology, EM                              | L60+M500+C400 / 14Td             | Effective |
| Kato S <i>et al.</i> (5)       | 2005 | Japan   | 1               | 11                 | 1:0         | DU              | Histology                                  | L40+A1500+C800 / 7Td             | Effective |
| Okiyama Y <i>et al.</i> (6)    | 2005 | Japan   | 2               | -                  | -           | MALT            | Histology                                  | L60+A1500+C800 / 7Td             | Effective |
| Siala K <i>et al.</i> (7)      | 2007 | Czech   | 1               | 17                 | 1:0         | CG              | Histology                                  | OACM <sup>#2</sup>               | Effective |
| Ohtaka M <i>et al.</i> (8)     | 2012 | Japan   | 1               | 64                 | 0:1         | GP              | Histology?                                 | L60+A1500+C400 / 7Td             | Effective |
| Joosten M <i>et al.</i> (9)    | 2013 | Belgium | 1               | 33                 | 1:0         | Dyspepsia       | Histology and PCR ( <i>H. suis</i> )       | P80+A2000+C1000 / 10Td           | Effective |
| Okamura I <i>et al.</i> (10)   | 2013 | Japan   | 1               | 46                 | 1:0         | MALT            | Histology and PCR ( <i>H. suis</i> )       | R20+A1500+C800 / 7Td             | Effective |
| Matsumoto I <i>et al.</i> (11) | 2014 | Japan   | 1               | 62                 | 0:1         | GU              | Histology and PCR ( <i>H. heilmannii</i> ) | L30A1500C1200 / 7Td              | Effective |
| Goji S <i>et al.</i> (12)      | 2015 | Japan   | 1               | 48                 | 0:1         | NG              | Histology and PCR ( <i>H. suis</i> )       | E40+A1500+C / 7Td                | Effective |
| Shiratori S <i>et al.</i> (13) | 2016 | Japan   | 1               | 48                 | 1:0         | CG              | Histology and PCR ( <i>H. suis</i> )       | R20+A1500+C / 7Td                | Effective |
| Nakagawa S <i>et al.</i> (14)  | 2018 | Japan   | 1               | 56                 | 1:0         | MALT            | Histology and PCR ( <i>H. suis</i> )       | E40+A1500+M500 / 10Td            | Effective |
| Takigawa H <i>et al.</i> (15)  | 2019 | Japan   | 4               | 40 (36-45)         | 4:0         | MALT            | Histology and PCR ( <i>H. suis</i> )       | L60+A1500+C400 / 7Td             | Effective |
| Nakamura M <i>et al.</i> (16)  | 2020 | Japan   | 49              | -                  | -           | Gastric disease | PCR <sup>#3</sup>                          | PPI+A+C or M / 7 or 10Td         | Effective |

NHPH: non-*Helicobacter pylori* Helicobacters; EM: electron micrograph; O: omeprazole; E: esomeprazole; L: lansoprazole; R: rabeprazole; P: pantoprazole; A: amoxicillin; C: clarithromycin; M: metronidazole; TC: tetracycline; ES: ecabet sodium; NG: nodular gastritis; CG: chronic gastritis; GU: gastric ulcer; GP: gastric plasmacytoma; AGML: acute gastric mucosal lesions; EG: erosive gastritis; MALT: gastric MALT lymphoma.

<sup>#1</sup> Two of five patients were identified as having *H. heilmannii* type I (has been identified as *H. suis*) by sequencing of the 16S rRNA gene.

<sup>#2</sup> Unknown number of days.

<sup>#3</sup> Twenty cases were *H. suis*, 7 were *H. heilmannii* / *Helicobacter ailurogastricus*, and the other 22 cases were unknown.

**Table S2. Summary of genome sequences of *H. suis* isolates**

| Strain                 | Accession No.         | Total Length | No. of Sequences | GC Content | N50       | No. of CDSs | No. of RNAs | Coding Ratio |
|------------------------|-----------------------|--------------|------------------|------------|-----------|-------------|-------------|--------------|
| <b>Complete genome</b> |                       |              |                  |            |           |             |             |              |
| NHP19-4003             | AP023039-<br>AP023041 | 1,715,041 bp | 3 (2 plasmids)   | 40.00%     | 1,689,367 | 1,757       | 44          | 90.80%       |
| NHP19-4004             | AP023042-<br>AP023045 | 1,738,770 bp | 4 (3 plasmids)   | 40.00%     | 1,703,808 | 1,776       | 45          | 89.60%       |
| NHP19-4022             | AP023046-<br>AP023048 | 1,682,860 bp | 3 (2 plasmids)   | 40.10%     | 1,670,524 | 1,733       | 44          | 90.70%       |
| NHP19-0020             | AP023036-<br>AP023038 | 1,777,109 bp | 3 (2 plasmids)   | 39.80%     | 1,726,209 | 1,835       | 45          | 90.80%       |
| SNTW101c               | AP019774-<br>AP019776 | 1,694,897 bp | 3 (2 plasmids)   | 40.00%     | 1,680,021 | 1,744       | 44          | 90.70%       |
| <b>Draft genome</b>    |                       |              |                  |            |           |             |             |              |
| NHP19-0033             | BLRI01000000          | 1,662,732 bp | 163              | 39.90%     | 22,958    | 1,604       | 41          | 86.20%       |
| HS1                    | ADGY00000000          | 1,625,992 bp | 78               | 39.90%     | 46,022    | 1,605       | 41          | 88.40%       |
| HS2                    | FZLI00000000          | 1,632,057 bp | 84               | 40.00%     | 44,089    | 1,613       | 42          | 88.30%       |
| HS3                    | FZKT00000000          | 1,647,490 bp | 81               | 40.00%     | 42,680    | 1,632       | 42          | 88.60%       |
| HS4                    | FZKI00000000          | 1,639,168 bp | 84               | 39.90%     | 46,278    | 1,609       | 42          | 88.40%       |
| HS5                    | ADHO00000000          | 1,644,767 bp | 78               | 39.90%     | 44,807    | 1,623       | 42          | 88.60%       |
| HS6                    | FZLD00000000          | 1,641,870 bp | 84               | 40.00%     | 44,929    | 1,620       | 42          | 88.50%       |
| HS7                    | FZKH00000000          | 1,636,417 bp | 82               | 39.90%     | 45,589    | 1,627       | 41          | 88.90%       |
| HS8                    | FZKJ00000000          | 1,637,926 bp | 89               | 40.00%     | 38,616    | 1,621       | 41          | 88.50%       |
| HS9                    | FZLE00000000          | 1,644,324 bp | 86               | 40.00%     | 48,752    | 1,619       | 43          | 88.00%       |
| HS10                   | FZKV00000000          | 1,655,684 bp | 81               | 39.90%     | 48,664    | 1,647       | 42          | 89.20%       |

The indicated data of complete genomes of isolates NHP19-4003 (human), NHP19-4004 (human), NHP19-4022 (human), NHP19-0020 (pig), and SNTW101c (human, mouse adapted) (A) and draft genomes of isolates NHP19-0033, HS1, HS2, HS3, HS4, HS5, HS6, HS7, HS8, HS9, and HS10 (all from pigs) are shown (B).

**Table S3. Summary of genome sequencing analysis of *H. suis* isolates recovered from mouse stomachs 4 months after infection**

| Isolate        | Mouse No. | Accession No. | Mapped reads   | Coverage | Mapped reads | Total mutations | Non-synonymous mutations |
|----------------|-----------|---------------|----------------|----------|--------------|-----------------|--------------------------|
| <b>A</b>       |           |               |                |          |              |                 |                          |
| NHP19-4003_1-1 | 1         | DRS142271     | 146,439,307 bp | 85.39x   | 99.40%       | 25              | 18                       |
| NHP19-4003_1-4 | 1         | DRS142272     | 163,483,997 bp | 95.32x   | 99.46%       | 26              | 17                       |
| NHP19-4003_2-4 | 2         | DRS142273     | 165,392,773 bp | 96.44x   | 99.32%       | 23              | 16                       |
| NHP19-4003_3-1 | 2         | DRS142274     | 150,763,986 bp | 87.91x   | 99.52%       | 20              | 14                       |
| NHP19-4003_3-2 | 3         | DRS142275     | 166,318,659 bp | 96.98x   | 99.50%       | 30              | 15                       |
| NHP19-4003_3-3 | 3         | DRS142276     | 183,896,780 bp | 107.23x  | 99.42%       | 21              | 13                       |
| NHP19-4003_4-3 | 4         | DRS142277     | 159,051,676 bp | 92.74x   | 99.44%       | 24              | 15                       |
| NHP19-4003_4-4 | 4         | DRS142278     | 185,469,156 bp | 108.14x  | 99.43%       | 22              | 16                       |
| NHP19-4003_5-1 | 5         | DRS142279     | 179,975,089 bp | 104.94x  | 99.48%       | 23              | 13                       |
| NHP19-4003_5-2 | 5         | DRS142280     | 172,565,948 bp | 100.62x  | 99.42%       | 21              | 13                       |
| NHP19-4003_6-1 | 6         | DRS142281     | 168,419,994 bp | 98.20x   | 99.42%       | 17              | 13                       |
| NHP19-4003_6-3 | 6         | DRS142282     | 179,574,855 bp | 104.71x  | 99.46%       | 20              | 15                       |
| <b>B</b>       |           |               |                |          |              |                 |                          |
| NHP19-4004_1-1 | 1         | DRS142283     | 229,711,303 bp | 132.11x  | 98.12%       | 12              | 5                        |
| NHP19-4004_1-2 | 1         | DRS142284     | 229,394,812 bp | 131.93x  | 97.45%       | 16              | 9                        |
| NHP19-4004_2-1 | 2         | DRS142285     | 233,314,312 bp | 134.18x  | 97.24%       | 13              | 7                        |
| NHP19-4004_2-2 | 2         | DRS142286     | 219,196,450 bp | 126.06x  | 97.20%       | 15              | 8                        |
| NHP19-4004_3-1 | 3         | DRS142287     | 162,880,464 bp | 93.68x   | 97.04%       | 11              | 4                        |
| NHP19-4004_3-2 | 3         | DRS142288     | 153,877,060 bp | 88.50x   | 97.32%       | 11              | 5                        |
| NHP19-4004_4-1 | 4         | DRS142289     | 102,541,596 bp | 58.97x   | 98.25%       | 11              | 6                        |
| NHP19-4004_4-2 | 4         | DRS142290     | 139,688,786 bp | 80.34x   | 96.33%       | 11              | 6                        |
| NHP19-4004_5-1 | 5         | DRS142291     | 145,116,103 bp | 83.46x   | 97.52%       | 9               | 4                        |
| NHP19-4004_5-2 | 5         | DRS142292     | 165,921,687 bp | 95.42x   | 98.15%       | 9               | 4                        |
| NHP19-4004_6-1 | 6         | DRS142293     | 156,507,638 bp | 90.01x   | 96.58%       | 10              | 4                        |
| NHP19-4004_6-2 | 6         | DRS142294     | 378,168,261 bp | 217.49x  | 96.63%       | 20              | 9                        |

The indicated data from reference mapping of sequencing reads of 12 isolates from NHP19-4003–infected mice to the NHP19-4003 genome (A) and reference mapping of sequencing reads of 12 isolates from NHP19-4004–infected mice to the NHP19-4004 genome are shown (B).

**Table S4. Definitions for histopathological scoring of mouse stomach sections**

| <b>Score</b> | <b>Density of neutrophils in the gastric muscularis mucosa</b> | <b>Lymphocytic infiltration in the gastric muscularis mucosa</b> | <b>Degree of mucosal metaplasia</b>                                       | <b>Lymph follicles</b>                         |
|--------------|----------------------------------------------------------------|------------------------------------------------------------------|---------------------------------------------------------------------------|------------------------------------------------|
| <b>0</b>     | None                                                           | None                                                             | None                                                                      | None                                           |
| <b>1</b>     | Up to 50% of crypts (area) in the section involved             | 10 cells /high-power field                                       | One focal area (one to four crypts) in a section                          | Number of lymph follicles (>200 μm) are shown. |
| <b>2</b>     | More than 50% of crypts (area) in the section involved         | Some areas with dense lymphocytes                                | Multiple foci in a section                                                |                                                |
| <b>3</b>     | All crypts (area) in the section involved                      | Diffuse infiltration with dense lymphocytes                      | More than 50% gastric epithelium diffusely replaced by mucosal metaplasia |                                                |



## References

1. A. F. Goddard, R. P. Logan, J. C. Atherton, D. Jenkins, R. C. Spiller, Healing of duodenal ulcer after eradication of *Helicobacter heilmannii*. *Lancet* **349**, 1815-1816 (1997).
2. T. Yamamoto *et al.*, *Helicobacter heilmannii* associated erosive gastritis. *Intern Med* **38**, 240-243 (1999).
3. A. Morgner *et al.*, *Helicobacter heilmannii*-associated primary gastric low-grade MALT lymphoma: complete remission after curing the infection. *Gastroenterology* **118**, 821-828 (2000).
4. M. Yoshimura *et al.*, A case of acute gastric mucosal lesions associated with *Helicobacter heilmannii* infection. *Helicobacter* **7**, 322-326 (2002).
5. S. Kato *et al.*, *Helicobacter heilmannii* infection in a child after successful eradication of *Helicobacter pylori*: case report and review of literature. *J Gastroenterol* **40**, 94-97 (2005).
6. Y. Okiyama *et al.*, *Helicobacter heilmannii* infection: clinical, endoscopic and histopathological features in Japanese patients. *Pathol Int* **55**, 398-404 (2005).
7. K. Siala, J. Sykora, O. Hes, J. Varvarovska, P. Pazdiora, *Helicobacter heilmannii* reinfection in a *Helicobacter pylori* negative adolescent: a 4-year follow-up. *J Clin Gastroenterol* **41**, 221-222 (2007).
8. M. Ohtaka *et al.*, Complete remission of gastric plasmacytoma following eradication of "Candidatus *Helicobacter heilmannii*". *Clin J Gastroenterol* **5**, 158-163 (2012).
9. M. Joosten *et al.*, Case report: *Helicobacter suis* infection in a pig veterinarian. *Helicobacter* **18**, 392-396 (2013).
10. T. Okamura *et al.*, A case of *Helicobacter heilmannii*-associated primary gastric mucosa-associated lymphoid tissue lymphoma achieving complete remission after eradication. *Clin J Gastroenterol* **6**, 38-45 (2013).
11. T. Matsumoto *et al.*, *Helicobacter heilmannii* sensu stricto-related gastric ulcers: a case report. *World J Gastroenterol* **20**, 3376-3382 (2014).
12. S. Goji *et al.*, *Helicobacter suis*-Infected Nodular Gastritis and a Review of Diagnostic Sensitivity for *Helicobacter heilmannii*-Like Organisms. *Case Rep Gastroenterol* **9**, 179-187 (2015).
13. S. Shiratori *et al.*, Two Cases of Chronic Gastritis with non-*Helicobacter pylori* *Helicobacter* Infection. *Intern Med* **55**, 1865-1869 (2016).
14. S. Nakagawa *et al.*, The Resolution of *Helicobacter suis*-associated Gastric Lesions after Eradication Therapy. *Intern Med* **57**, 203-207 (2018).
15. H. Takigawa *et al.*, *Helicobacter suis* infection is associated with nodular gastritis-like appearance of gastric mucosa-associated lymphoid tissue lymphoma. *Cancer Med* **8**, 4370-4379 (2019).

16. M. Nakamura *et al.*, PCR analysis and specific immunohistochemistry revealing a high prevalence of non-*Helicobacter pylori* *Helicobacters* in *Helicobacter pylori*-negative gastric disease patients in Japan: High susceptibility to an Hp eradication regimen. *Helicobacter* **25**, e12700 (2020).
